# Supplementary material for: Association between Mothers’ Emotional Problems and Autistic Children’s Behavioral Problems: The Moderating Effect of Parenting Style
Source: MDPI journal article supplement (doi:10.3390/ijerph20054593), 2023-03-05
Supplement: s1 [file s1]

# Association between Mothers' Emotional Problems and Autistic Children's Behavioral Problems: The Moderating Effect of Parenting Style

## Supplementary materials

Table S1 The prevalence of mother's emotional problems and behavioral problems in children with autism

| Variables | Total samples | %  |      |
|-----------|---------------|----|------|
| SDQ_HA    | Normal        | 14 | 17.5 |
|           | Borderline    | 13 | 16.3 |
|           | Abnormal      | 53 | 66.3 |
| SDQ_ES    | Normal        | 60 | 75   |
|           | Borderline    | 15 | 18.8 |
|           | Abnormal      | 5  | 6.3  |
| SDQ_PB    | Normal        | 12 | 15   |
|           | Borderline    | 6  | 7.5  |
|           | Abnormal      | 62 | 77.5 |
| SDQ_PP    | Normal        | 5  | 6.3  |
|           | Borderline    | 4  | 5    |
|           | Abnormal      | 71 | 88.8 |
| SDQ_CP    | Normal        | 50 | 62.5 |
|           | Borderline    | 17 | 21.3 |

|            |          |    |      |
|------------|----------|----|------|
|            | Abnormal | 13 | 16.3 |
| Maternal   |          |    |      |
| Depression | No       | 49 | 61.3 |
|            | Yes      | 31 | 38.8 |
| Anxiety    |          |    |      |
|            | No       | 50 | 62.5 |
|            | Yes      | 30 | 37.5 |

---

TableS2 Multivariate regression models of the predictors of SDQ scores

| Model                | SDQ-HA             |               | SDQ-ES             |        | SDQ-PB             |                | SDQ-PP             |        | SDQ-CP             |               | SDQ-total scores   |       |
|----------------------|--------------------|---------------|--------------------|--------|--------------------|----------------|--------------------|--------|--------------------|---------------|--------------------|-------|
|                      | Adjusted $\beta$ # | t             | Adjusted $\beta$ # | t      | Adjusted $\beta$ # | t              | Adjusted $\beta$ # | t      | Adjusted $\beta$ # | t             | Adjusted $\beta$ # | t     |
| Model 1              |                    |               |                    |        |                    |                |                    |        |                    |               |                    |       |
| Supportive/engaged   | -0.033             | -0.247        | -0.016             | -0.115 | 0.158              | 1.298          | 0.093              | 0.669  | -0.012             | -0.092        | 0.114              | 0.877 |
| Depression           | <b>0.345</b>       | <b>2.614*</b> | -0.139             | -1.01  | -0.221             | -1.839         | 0.161              | 1.171  | 0.305              | 2.284         | 0.176              | 1.367 |
| Supportive/engaged*  | 0.052              | 0.395         | -0.122             | -0.891 | 0.176              | 1.477          | 0.078              | 0.574  | 0.209              | <b>1.579*</b> | 0.198              | 1.548 |
| Depression           |                    |               |                    |        |                    |                |                    |        |                    |               |                    |       |
| R2                   | 0.087              |               | 0.083              |        | 0.242              |                | 0.013              |        | 0.066              |               | 0.199              |       |
| F                    | 0.156              |               | 1.103              |        | 5.198              |                | 1.179              |        | 1.931              |               | 3.029              |       |
| Model 2              |                    |               |                    |        |                    |                |                    |        |                    |               |                    |       |
| Hostile/coercive     | 0.055              | <b>0.47*</b>  | 0.134              | 1.08   | 0.108              | 1.001          | 0.142              | 1.155  | 0.067              | 0.547         | 0.067              | 0.547 |
| Depression           | 0.326              | 2.871         | -0.126             | -1.059 | -0.339             | -3.288         | 0.081              | 0.691  | 0.231              | 1.976         | 0.231              | 1.976 |
| Hostile/coercive*    | 0.113              | 0.987         | -0.026             | -0.221 | -0.187             | <b>-1.799*</b> | -0.082             | -0.694 | 0.109              | 0.923         | 0.109              | 0.923 |
| Depression           |                    |               |                    |        |                    |                |                    |        |                    |               |                    |       |
| R2                   | 0.098              |               | 0.086              |        | 0.011              |                | 0.31               |        | 0.028              |               | 0.039              |       |
| F                    | 2.438              |               | 1.145              |        | 1.145              |                | 5.468              |        | 1.376              |               | 1.53               |       |
| Model 3              |                    |               |                    |        |                    |                |                    |        |                    |               |                    |       |
| Supportive / engaged | -0.126             | -1.117        | 0.069              | 0.575  | -                  |                | 0.022              | 0.18   | -0.139             | -1.173        | 0.05               | 0.446 |

|                       |       |                |        |        |   |       |       |       |       |        |               |
|-----------------------|-------|----------------|--------|--------|---|-------|-------|-------|-------|--------|---------------|
| Anxiety               | 0.343 | <b>3.067**</b> | -0.062 | -0.523 |   | 0.078 | 0.661 | 0.162 | 1.388 | 0.105  | 0.961         |
| Supportive / engaged* | 0.005 | 0.043          | 0.011  | 0.093  |   | 0.002 | 0.019 | 0.112 | 0.959 | 0.192  | 1.747         |
| Anxiety               |       |                |        |        |   |       |       |       |       |        |               |
| R2                    | 0.108 |                | -0.005 |        |   | 0.001 |       | 0.029 |       | 0.141  |               |
| F                     | 2.592 |                | 0.931  |        |   | 1.012 |       | 1.389 |       | 3.165  |               |
| Model 4               |       |                |        |        | - |       |       |       |       |        |               |
| Hostile/coercive      | 0.083 | 0.704          | 0.118  | 0.95   |   | 0.149 | 1.208 | 0.09  | 0.728 | 0.263  | <b>2.306*</b> |
| Anxiety               | 0.345 | <b>3.09**</b>  | -0.084 | -0.715 |   | 0.058 | 0.501 | 0.155 | 1.316 | 0.054  | 0.502         |
| Hostile/coercive*     | 0.071 | 0.625          | -0.024 | -0.2   |   | -0.04 | -0.34 | 0.097 | 0.815 | -0.099 | -0.907        |
| Anxiety               |       |                |        |        |   |       |       |       |       |        |               |
| R2                    | 0.105 |                | 0.002  |        |   | 0.02  |       | 0.008 |       | 0.167  |               |
| F                     | 2.55  |                | 1.032  |        |   | 1.269 |       | 1.105 |       | 3.645  |               |

---

Note: Adjusted variable: children age, children sex, family income

Table S3 Multivariate regression models of the predictors of SCQ scores

| Model                          | SCQ-social         |       | SCQ- communication |        | SCQ-replacatve     |        | SCQ-total scores   |                |
|--------------------------------|--------------------|-------|--------------------|--------|--------------------|--------|--------------------|----------------|
|                                | Adjusted $\beta$ # | t     | Adjusted $\beta$ # | t      | Adjusted $\beta$ # | t      | Adjusted $\beta$ # | t              |
| Model 1                        |                    |       |                    |        |                    |        |                    |                |
| Supportive/engaged             | 0.114              | 0.877 | -0.273             | -2.088 | 0.002              | 0.018  | -0.212             | -1.672         |
| Depression                     | 0.176              | 1.367 | 0.049              | 0.381  | 0.075              | 0.567  | 0.119              | 0.944          |
| Supportive/engaged* Depression | 0.198              | 1.548 | 0.05               | 0.391  | 0.107              | 0.813  | 0.132              | 1.059          |
| R2                             | 0.167              |       | 0.119              |        | 0.079              |        | 0.174              |                |
| F                              | 1.045              |       | 2.782              |        | 2.137              |        | 3.778              |                |
| Model 2                        |                    |       |                    |        |                    |        |                    |                |
| Hostile/coercive               | 0.149              | 1.208 | 0.004              | 0.033  | 0.175              | 1.482  | -0.273             | 0.018          |
| Depression                     | 0.058              | 0.501 | 0.118              | 1.023  | 0.007              | 0.063  | 0.049              | 0.567          |
| Hostile/coercive* Depression   | -0.04              | -0.34 | 0.198              | 1.704  | 0.009              | 0.074  | 0.05               | 0.813          |
| R2                             | 0.02               |       | 0.07               |        | 0.097              |        | 0.119              | 0.018          |
| F                              | 1.269              |       | 2.02               |        | 2.414              |        | 2.782              | 0.567          |
| Model 3                        |                    |       |                    |        |                    |        |                    |                |
| Supportive / engaged           | -                  |       | -0.263             | -2.396 | -0.028             | -0.247 | -0.22              | <b>-2.13*</b>  |
| Anxiety                        | -                  |       | 0.204              | 1.884  | 0.135              | 1.195  | 0.285              | <b>2.796**</b> |
| Supportive / engaged* Anxiety  | -                  |       | 0.087              | 0.797  | 0.067              | 0.592  | 0.179              | 1.754          |
| R2                             | -                  |       | 0.161              |        | 0.091              |        | 0.259              |                |
| F                              | -                  |       | 3.535              |        | 2.317              |        | 5.601              |                |
| Model 4                        |                    |       |                    |        |                    |        |                    |                |

|                           |   |        |        |       |        |        |         |
|---------------------------|---|--------|--------|-------|--------|--------|---------|
| Hostile/coercive          | - | -0.005 | -0.038 | 0.174 | 1.479  | -0.038 | -0.333  |
| Anxiety                   | - | 0.223  | 1.981  | 0.112 | 1.006  | 0.295  | 2.767** |
| Hostile/coercive* Anxiety | - | 0.147  | 1.284  | -0.04 | -0.355 | 0.186  | 1.721   |
| R2                        | - | 0.09   |        | 0.111 |        | 0.185  |         |

---

Note: Adjusted variable: children age, children sex, family income
